# Supplementary material for: Wrinkle in the plan: miR-34a-5p impacts chemokine signaling by modulating CXCL10/CXCL11/CXCR3-axis in CD4+, CD8+ T cells, and M1 macrophages
Source: PubMed Central journal article supplement — J Immunother Cancer. 2020 Nov 23;8(2):e001617. doi: 10.1136/jitc-2020-001617 (PMC7684812; doi:10.1136/jitc-2020-001617), 2020-11-23
Supplement: jitc-2020-001617supp001.pdf [file jitc-2020-001617supp001.pdf]

## Supplementary Table 1

| target gene | NCBI RefSeq | cloning primers                  | sequence<br>(restriction sites are underlined)                                      |
|-------------|-------------|----------------------------------|-------------------------------------------------------------------------------------|
| CXCR1       | NM_000634.2 | 5'-CXCR1-SpeI<br>3'-CXCR1-NaeI   | <u>GGACTAGT</u> GTTGTGTGTGGAAGGTGATC<br>GCCGGCGCATTGGGGAGGGACTGGTG                  |
| CXCR2       | NM_001557.3 | 5'-CXCR2-SpeI<br>3'-CXCR2-NaeI   | <u>GGACTAGT</u> CCCTTGCATGGTTTAGAAAGCTTGCC<br>GCCGGCGATATTGAATGAAATCATTTAAC         |
| CXCR3       | NM_001504.1 | 5'-CXCR3-SpeI<br>3'-CXCR3-SacI   | <u>GGACTAGT</u> GATTTCATCCTGGTCTGAGAC<br><u>CGAGCTC</u> GGTCTGACGATCTTGTTTATTG      |
| CXCL1       | NM_001511.3 | 5'-CXCL1-SpeI<br>3'-CXCL1-SacI   | <u>GGACTAGT</u> GAAGCTCACTGGTGGCTGTTC<br><u>CGAGCTC</u> CCAGATTTTCCAGTAAAGGTAGCCC   |
| CXCL2       | NM_002089.3 | 5'-CXCL2-SpeI<br>3'-CXCL2-SacI   | <u>GGACTAGT</u> GACCAGAAGGAAGGAGGAAG<br><u>CGAGCTC</u> CGAAACCTCTCTGCTCTAAC         |
| CXCL5       | NM_002994.4 | 5'-CXCL5-SpeI<br>3'-CXCL5-SacI   | <u>GGACTAGT</u> GTGTGAGCCAGGAATCACTG<br><u>CGAGCTC</u> CATTCCAAGCTCTCTCTGGTC        |
| CXCL10      | NM_001565.3 | 5'-CXCL10-SpeI<br>3'-CXCL10-SacI | <u>GGACTAGT</u> GATGCAGTGCTTCCAAGGATG<br><u>CGAGCTC</u> CTTATGTAACATGCAGAGC         |
| CXCL11      | NM_005409.4 | 5'-CXCL11-SpeI<br>3'-CXCL11-SacI | <u>GGACTAGT</u> GTGAAGGATGAAAGGTGGGTGAAAG<br><u>CGAGCTC</u> CGATGTGCTACATGATGTTGGGG |
| CXCL12      | NM_199168.3 | 5'-CXCL12-SpeI<br>3'-CXCL12-SacI | <u>GGACTAGT</u> CTTGTGGAGCATCTCCTCTG<br><u>CGAGCTC</u> GTCTTTTGGGGTAAGCAG           |
| CXCL14      | NM_004887.4 | 5'-CXCL13-SpeI<br>3'-CXCL13-SacI | <u>GGACTAGT</u> GCAGTGTGCTCCATTCTTAGC<br><u>CGAGCTC</u> GAAACCTGCATGCAATGCTAATGG    |
| CXCL16      | NM_022059.3 | 5'-CXCL14-SpeI<br>3'-CXCL14-SacI | <u>GGACTAGT</u> GTGCTTATGGAACCTCTGAG<br><u>CGAGCTC</u> CGAACAACCTGGTGTACTGGGAG      |
