# Supplementary material for: Wrinkle in the plan: miR-34a-5p impacts chemokine signaling by modulating CXCL10/CXCL11/CXCR3-axis in CD4+, CD8+ T cells, and M1 macrophages
Source: PubMed Central journal article supplement — J Immunother Cancer. 2020 Nov 23;8(2):e001617. doi: 10.1136/jitc-2020-001617 (PMC7684812; doi:10.1136/jitc-2020-001617), 2020-11-23
Supplement: jitc-2020-001617supp002.pdf [file jitc-2020-001617supp002.pdf]

## Supplementary Table 2

| mutagenesis primers (mutated sites are underlined) |                                                             |
|----------------------------------------------------|-------------------------------------------------------------|
| name                                               | sequence                                                    |
| 5'-CXCR1-mut                                       | GCTGGAGACATGAGGCAGGTCGCGAGAAAACATCAACCTGCCAGC               |
| 3'-CXCR1-mut                                       | GCTGGCAGGTTGATGTTTTCT <u>TCGCGA</u> CCTGCCTCAATGTCTCCAGC    |
| 5'-CXCR3-mut                                       | GGCTGCCTGGAGCCCTCGCGAGCTTCTCATTGGAAC                        |
| 3'-CXCR3-mut                                       | GTTTCCAAATGAGAAGCT <u>TCGCGA</u> GGGCTCCAGGCAGCC            |
| 5'-CXCL1-mut                                       | GTCTTTCTTGTAAAGGCAT <u>TCGCGA</u> TTGTTTAATGGTAGTTTACAG     |
| 3'-CXCL1-mut                                       | CTGTAAACTACCATTAAACA <u>TCGCGA</u> ATGCCTTACAAGAAAGAC       |
| 5'-CXCL10-mut                                      | CTTCATGGACTTCT <u>TCGCGA</u> GATCCTCCCAAGGG                 |
| 3'-CXCL10-mut                                      | CCCTTGGGAGGATCT <u>TCGCGA</u> GAGTCCATGAAG                  |
| 5'-CXCL11-mut                                      | GAATGACAATCAGAATTCT <u>TCGCGA</u> GCAAAGGAGTCCAACAATTAATG   |
| 3'-CXCL11-mut                                      | CATTTAATTGTTGGACTCCTTTGCT <u>TCGCGA</u> GAGAATTCTGATGTCATTC |
| 5'-CXCL14-mut                                      | CTTAAGAACGCCCCCTCCACAT <u>TCGCGA</u> GCCCCAGTATATGCCGATTG   |
| 3'-CXCL14-mut                                      | CAATGCGGCATATACTGGGGCT <u>TCGCGA</u> TGTGGAGGGGGCGTTCTTAAG  |
| 5'-CXCL16-mut                                      | CATAGGACTAACCAGCC <u>CACGTG</u> GCTCTCTTAGGCCCTCATTTAAAAACG |
| 3'-CXCL16-mut                                      | CGTTTTTAATGAGGGCCTAAGAGAGCC <u>CACGTG</u> GCTGGTTAGTCCTATG  |
