# Supplementary material for: Wrinkle in the plan: miR-34a-5p impacts chemokine signaling by modulating CXCL10/CXCL11/CXCR3-axis in CD4+, CD8+ T cells, and M1 macrophages
Source: PubMed Central journal article supplement — J Immunother Cancer. 2020 Nov 23;8(2):e001617. doi: 10.1136/jitc-2020-001617 (PMC7684812; doi:10.1136/jitc-2020-001617), 2020-11-23
Supplement: jitc-2020-001617supp005.pdf [file jitc-2020-001617supp005.pdf]

## geneList.ora.zip

## WikiPathways

| Type     | Name                                               | #Hits | Expected score | p-Value  |
|----------|----------------------------------------------------|-------|----------------|----------|
| enriched | Toll-like Receptor Signaling Pathway               | 17    | 1.460220       | 0.000000 |
| enriched | Overview of interferons-mediated signaling pathway | 11    | 0.510368       | 0.000000 |
| enriched | Regulation of toll-like receptor signaling pathway | 17    | 1.970590       | 0.000000 |
| enriched | Hepatitis B infection                              | 17    | 2.140710       | 0.000000 |
| enriched | Cytosolic DNA-sensing pathway                      | 12    | 1.049090       | 0.000000 |
| enriched | PI3K-Akt Signaling Pathway                         | 19    | 4.820140       | 0.000115 |
| enriched | Allograft Rejection                                | 8     | 1.261740       | 0.007981 |
| enriched | Type II interferon signaling (IFNG)                | 5     | 0.524545       | 0.030793 |
| enriched | Fibrin Complement Receptor 3 Signaling Pathway     | 5     | 0.581252       | 0.042144 |

## GO - Molecular Function

| Type     | Name                                        | #Hits | Expected score | p-Value  |
|----------|---------------------------------------------|-------|----------------|----------|
| enriched | cytokine activity                           | 24    | 3.033850       | 0.000000 |
| enriched | cytokine receptor binding                   | 23    | 3.912820       | 0.000000 |
| enriched | type I interferon receptor binding          | 9     | 0.226830       | 0.000000 |
| enriched | receptor ligand activity                    | 28    | 6.592250       | 0.000000 |
| enriched | signaling receptor activator activity       | 28    | 6.663140       | 0.000000 |
| enriched | receptor regulator activity                 | 28    | 7.244390       | 0.000001 |
| enriched | signaling receptor binding                  | 48    | 21.506300      | 0.000050 |
| enriched | protein binding                             | 201   | 165.430000     | 0.001835 |
| enriched | deoxycytidine deaminase activity            | 4     | 0.113415       | 0.003383 |
| enriched | cytidine deaminase activity                 | 4     | 0.170123       | 0.010711 |
| enriched | molecular function regulator                | 45    | 24.767000      | 0.013585 |
| enriched | phosphatidylserine 1-acylhydrolase activity | 3     | 0.099238       | 0.045174 |

## GO - Biological Process

| Type     | Name                                                       | #Hits | Expected score | p-Value  |
|----------|------------------------------------------------------------|-------|----------------|----------|
| enriched | defense response to virus                                  | 30    | 2.721960       | 0.000000 |
| enriched | defense response                                           | 59    | 15.339400      | 0.000000 |
| enriched | response to external biotic stimulus                       | 58    | 15.282700      | 0.000000 |
| enriched | response to virus                                          | 31    | 3.955350       | 0.000000 |
| enriched | response to other organism                                 | 51    | 12.390600      | 0.000000 |
| enriched | defense response to other organism                         | 43    | 9.711160       | 0.000000 |
| enriched | cell surface receptor signaling pathway                    | 78    | 30.494500      | 0.000000 |
| enriched | immune response                                            | 49    | 13.354600      | 0.000000 |
| enriched | type I interferon signaling pathway                        | 16    | 0.921497       | 0.000000 |
| enriched | immune system process                                      | 76    | 29.955800      | 0.000000 |
| enriched | regulation of immune system process                        | 58    | 21.322000      | 0.000000 |
| enriched | natural killer cell activation involved in immune response | 10    | 0.326068       | 0.000000 |

|          |                                                                        |     |            |          |
|----------|------------------------------------------------------------------------|-----|------------|----------|
| enriched | response to exogenous dsRNA                                            | 12  | 0.637960   | 0.000000 |
| enriched | cytokine-mediated signaling pathway                                    | 35  | 9.243330   | 0.000000 |
| enriched | response to organic substance                                          | 70  | 30.537000  | 0.000000 |
| enriched | response to dsRNA                                                      | 12  | 0.723021   | 0.000000 |
| enriched | humoral immune response                                                | 20  | 3.005500   | 0.000000 |
| enriched | B cell proliferation                                                   | 11  | 0.581252   | 0.000000 |
| enriched | positive regulation of peptidyl-serine phosphorylation of STAT protein | 9   | 0.283538   | 0.000000 |
| enriched | response to stimulus                                                   | 126 | 76.087300  | 0.000000 |
| enriched | natural killer cell activation                                         | 11  | 0.723021   | 0.000001 |
| enriched | positive regulation of immune system process                           | 41  | 14.106000  | 0.000001 |
| enriched | T cell activation involved in immune response                          | 11  | 0.779729   | 0.000001 |
| enriched | regulation of cytokine production                                      | 33  | 9.753700   | 0.000001 |
| enriched | leukocyte proliferation                                                | 13  | 1.332630   | 0.000002 |
| enriched | regulation of immune response                                          | 40  | 14.020900  | 0.000002 |
| enriched | lymphocyte proliferation                                               | 12  | 1.148330   | 0.000003 |
| enriched | mononuclear cell proliferation                                         | 12  | 1.162500   | 0.000004 |
| enriched | T cell activation                                                      | 17  | 2.877910   | 0.000007 |
| enriched | signal transduction                                                    | 108 | 66.730600  | 0.000017 |
| enriched | lymphocyte activation                                                  | 21  | 4.820140   | 0.000018 |
| enriched | negative regulation of viral genome replication                        | 10  | 0.850613   | 0.000019 |
| enriched | B cell differentiation                                                 | 12  | 1.403510   | 0.000020 |
| enriched | positive regulation of cytokine production                             | 24  | 6.294540   | 0.000020 |
| enriched | leukocyte differentiation                                              | 19  | 4.026230   | 0.000022 |
| enriched | regulation of receptor signaling pathway via JAK-STAT                  | 13  | 1.772110   | 0.000027 |
| enriched | lymphocyte differentiation                                             | 16  | 2.863730   | 0.000028 |
| enriched | positive regulation of metabolic process                               | 86  | 50.441400  | 0.000079 |
| enriched | regulation of viral genome replication                                 | 11  | 1.360980   | 0.000105 |
| enriched | B cell activation                                                      | 13  | 2.084000   | 0.000134 |
| enriched | negative regulation of viral process                                   | 11  | 1.403510   | 0.000134 |
| enriched | positive regulation of immune response                                 | 29  | 9.923820   | 0.000141 |
| enriched | adaptive immune response                                               | 16  | 3.317390   | 0.000156 |
| enriched | innate immune response                                                 | 22  | 6.365420   | 0.000266 |
| enriched | cell activation                                                        | 35  | 14.063500  | 0.000308 |
| enriched | regulation of cell population proliferation                            | 47  | 22.470400  | 0.000456 |
| enriched | response to organic cyclic compound                                    | 29  | 10.646800  | 0.000493 |
| enriched | regulation of viral life cycle                                         | 12  | 2.027290   | 0.000534 |
| enriched | pyrimidine nucleoside catabolic process                                | 6   | 0.326068   | 0.000683 |
| enriched | regulation of protein phosphorylation                                  | 43  | 20.060300  | 0.000683 |
| enriched | positive regulation of protein phosphorylation                         | 34  | 14.035100  | 0.000697 |
| enriched | positive regulation of phosphorylation                                 | 35  | 14.758100  | 0.000761 |
| enriched | regulation of cellular process                                         | 186 | 148.489000 | 0.001130 |
| enriched | positive regulation of nitrogen compound metabolic process             | 74  | 44.288600  | 0.001158 |
| enriched | regulation of signal transduction                                      | 73  | 43.494700  | 0.001158 |
| enriched | positive regulation of peptidyl-serine phosphorylation                 | 10  | 1.488570   | 0.001167 |
| enriched | positive regulation of protein modification process                    | 38  | 17.139900  | 0.001167 |
| enriched | response to nitrogen compound                                          | 31  | 12.560700  | 0.001222 |
| enriched | regulation of phosphorylation                                          | 45  | 22.130100  | 0.001258 |
| enriched | positive regulation of cellular metabolic process                      | 76  | 46.230800  | 0.001314 |
| enriched | response to bacterium                                                  | 17  | 4.550780   | 0.001314 |
| enriched | cellular response to lipopolysaccharide                                | 12  | 2.296660   | 0.001374 |
| enriched | cellular process                                                       | 228 | 195.131000 | 0.001472 |
| enriched | cellular response to organic substance                                 | 41  | 19.521600  | 0.001522 |
| enriched | regulation of viral process                                            | 13  | 2.849550   | 0.002155 |
| enriched | cellular response to molecule of bacterial origin                      | 12  | 2.424250   | 0.002158 |
| enriched | leukocyte activation                                                   | 30  | 12.404800  | 0.002213 |
| enriched | locomotion                                                             | 33  | 14.503000  | 0.002614 |

|          |                                                                                                   |     |           |          |
|----------|---------------------------------------------------------------------------------------------------|-----|-----------|----------|
| enriched | negative regulation of cell population proliferation                                              | 25  | 9.512690  | 0.003225 |
| enriched | regulation of signaling                                                                           | 78  | 49.477300 | 0.003743 |
| enriched | pyrimidine nucleoside metabolic process                                                           | 6   | 0.510368  | 0.004531 |
| enriched | positive regulation of protein metabolic process                                                  | 45  | 23.746300 | 0.005673 |
| enriched | response to lipopolysaccharide                                                                    | 15  | 4.153830  | 0.005673 |
| enriched | positive regulation of cellular protein metabolic process                                         | 43  | 22.300200 | 0.005800 |
| enriched | DNA cytosine deamination                                                                          | 4   | 0.141769  | 0.005910 |
| enriched | regulation of smooth muscle cell proliferation                                                    | 10  | 1.899700  | 0.006257 |
| enriched | regulation of peptidyl-serine phosphorylation                                                     | 10  | 1.942230  | 0.007366 |
| enriched | regulation of phosphorus metabolic process                                                        | 46  | 24.852100 | 0.007514 |
| enriched | regulation of T cell differentiation                                                              | 10  | 1.956410  | 0.007606 |
| enriched | blood coagulation                                                                                 | 11  | 2.395890  | 0.007932 |
| enriched | regulation of lymphocyte activation                                                               | 18  | 5.968470  | 0.008188 |
| enriched | coagulation                                                                                       | 11  | 2.424250  | 0.008557 |
| enriched | regulation of body fluid levels                                                                   | 17  | 5.443920  | 0.008584 |
| enriched | response to molecule of bacterial origin                                                          | 15  | 4.380660  | 0.008744 |
| enriched | cytidine deamination                                                                              | 4   | 0.170123  | 0.009167 |
| enriched | cytidine to uridine editing                                                                       | 4   | 0.170123  | 0.009167 |
| enriched | hemostasis                                                                                        | 11  | 2.480950  | 0.009819 |
| enriched | regulation of T cell activation                                                                   | 15  | 4.451540  | 0.009919 |
| enriched | positive regulation of cytokine biosynthetic process                                              | 7   | 0.949851  | 0.011640 |
| enriched | cell motility                                                                                     | 29  | 13.170300 | 0.011709 |
| enriched | inflammatory response                                                                             | 18  | 6.209470  | 0.011709 |
| enriched | response to cytokine                                                                              | 21  | 7.981590  | 0.011709 |
| enriched | DNA deamination                                                                                   | 4   | 0.198476  | 0.013597 |
| enriched | negative regulation of immune system process                                                      | 18  | 6.308710  | 0.013597 |
| enriched | regulation of hemopoiesis                                                                         | 18  | 6.294540  | 0.013597 |
| enriched | regulation of secretion                                                                           | 26  | 11.299000 | 0.013597 |
| enriched | chemotaxis                                                                                        | 15  | 4.650020  | 0.014031 |
| enriched | nucleobase-containing small molecule catabolic process                                            | 6   | 0.680490  | 0.014031 |
| enriched | regulation of interferon-beta production                                                          | 6   | 0.680490  | 0.014031 |
| enriched | positive regulation of cell population proliferation                                              | 28  | 12.759200 | 0.015129 |
| enriched | positive regulation of interferon-beta production                                                 | 5   | 0.425306  | 0.015536 |
| enriched | regulation of cell differentiation                                                                | 45  | 25.249000 | 0.016646 |
| enriched | regulation of protein secretion                                                                   | 18  | 6.478840  | 0.017442 |
| enriched | regulation of leukocyte migration                                                                 | 11  | 2.736140  | 0.018695 |
| enriched | negative regulation of single stranded viral RNA replication via double stranded DNA intermediate | 4   | 0.226830  | 0.019124 |
| enriched | regulation of metabolic process                                                                   | 121 | 91.497600 | 0.020707 |
| enriched | positive regulation of protein secretion                                                          | 13  | 3.799400  | 0.021572 |
| enriched | cellular response to exogenous dsRNA                                                              | 4   | 0.241007  | 0.021705 |
| enriched | negative regulation of cytokine production                                                        | 13  | 3.827760  | 0.021705 |
| enriched | positive regulation of secretion                                                                  | 17  | 6.053530  | 0.021705 |
| enriched | regulation of cytokine biosynthetic process                                                       | 8   | 1.474400  | 0.021705 |
| enriched | regulation of establishment of protein localization                                               | 24  | 10.448400 | 0.021705 |
| enriched | regulation of locomotion                                                                          | 29  | 13.808300 | 0.021705 |
| enriched | regulation of protein transport                                                                   | 23  | 9.782050  | 0.021705 |
| enriched | regulation of lymphocyte differentiation                                                          | 10  | 2.381720  | 0.024208 |
| enriched | cell migration                                                                                    | 26  | 11.894400 | 0.024242 |
| enriched | cell population proliferation                                                                     | 19  | 7.343630  | 0.024242 |
| enriched | B cell receptor signaling pathway                                                                 | 5   | 0.496191  | 0.025247 |
| enriched | positive regulation of chemokine production                                                       | 6   | 0.793905  | 0.025247 |
| enriched | cellular response to cytokine stimulus                                                            | 17  | 6.195300  | 0.026358 |
| enriched | regulation of interleukin-6 production                                                            | 9   | 1.970590  | 0.026435 |
| enriched | positive regulation of striated muscle cell differentiation                                       | 6   | 0.822259  | 0.028908 |
| enriched | regulation of single stranded viral RNA replication via double stranded DNA intermediate          | 4   | 0.269361  | 0.028908 |

|          |                                                              |    |           |          |
|----------|--------------------------------------------------------------|----|-----------|----------|
| enriched | regulation of protein localization                           | 29 | 14.247800 | 0.031595 |
| enriched | regulation of sarcomere organization                         | 3  | 0.099238  | 0.031918 |
| enriched | DNA demethylation                                            | 4  | 0.283538  | 0.033448 |
| enriched | regulation of angiogenesis                                   | 13 | 4.068770  | 0.034268 |
| enriched | positive regulation of peptide secretion                     | 13 | 4.082940  | 0.035099 |
| enriched | positive regulation of establishment of protein localization | 17 | 6.436300  | 0.037481 |
| enriched | base conversion or substitution editing                      | 4  | 0.297715  | 0.037594 |
| enriched | cellular response to dsRNA                                   | 4  | 0.297715  | 0.037594 |
| enriched | regulation of cell activation                                | 19 | 7.683870  | 0.037594 |
| enriched | positive regulation of apoptotic process                     | 21 | 9.002320  | 0.038551 |
| enriched | positive regulation of protein transport                     | 16 | 5.897580  | 0.040247 |
| enriched | regulation of muscle cell differentiation                    | 9  | 2.126530  | 0.040247 |
| enriched | regulation of cellular protein metabolic process             | 57 | 36.377900 | 0.040870 |
| enriched | positive regulation of cell death                            | 22 | 9.739520  | 0.041330 |
| enriched | positive regulation of programmed cell death                 | 21 | 9.073210  | 0.041330 |
| enriched | demethylation                                                | 6  | 0.921497  | 0.045042 |
| enriched | negative regulation of transposition                         | 4  | 0.326068  | 0.048107 |

## Reactome\_-\_Pathways

| Type     | Name                                                                  | #Hits | Expected score | p-Value  |
|----------|-----------------------------------------------------------------------|-------|----------------|----------|
| enriched | Interferon alpha/beta signaling                                       | 16    | 0.949851       | 0.000000 |
| enriched | Regulation of IFNA signaling                                          | 10    | 0.368599       | 0.000000 |
| enriched | TRAF6 mediated IRF7 activation                                        | 10    | 0.411130       | 0.000000 |
| enriched | Factors involved in megakaryocyte development and platelet production | 11    | 1.545280       | 0.000113 |
| enriched | Formation of the Editosome                                            | 3     | 0.127592       | 0.041282 |
| enriched | mRNA Editing: C to U Conversion                                       | 3     | 0.127592       | 0.041282 |

## GO\_-\_Cellular\_Component

| Type     | Name                             | #Hits | Expected score | p-Value  |
|----------|----------------------------------|-------|----------------|----------|
| enriched | extracellular region             | 51    | 25.078900      | 0.001130 |
| enriched | extracellular space              | 41    | 20.131200      | 0.007170 |
| enriched | external side of plasma membrane | 14    | 4.012060       | 0.025875 |

## KEGG\_-\_Pathways

| Type     | Name                                            | #Hits | Expected score | p-Value  |
|----------|-------------------------------------------------|-------|----------------|----------|
| enriched | Influenza A                                     | 20    | 2.395890       | 0.000000 |
| enriched | Toll-like receptor signaling pathway            | 17    | 1.488570       | 0.000000 |
| enriched | Hepatitis B                                     | 18    | 2.296660       | 0.000000 |
| enriched | Measles                                         | 17    | 1.956410       | 0.000000 |
| enriched | Cytokine-cytokine receptor interaction          | 23    | 4.182180       | 0.000000 |
| enriched | RIG-I-like receptor signaling pathway           | 13    | 0.992382       | 0.000000 |
| enriched | Autoimmune thyroid disease                      | 11    | 0.737198       | 0.000000 |
| enriched | Hepatitis C                                     | 16    | 2.197420       | 0.000000 |
| enriched | Jak-STAT signaling pathway                      | 16    | 2.296660       | 0.000000 |
| enriched | Cytosolic DNA-sensing pathway                   | 11    | 0.893144       | 0.000000 |
| enriched | Natural killer cell mediated cytotoxicity       | 14    | 1.842990       | 0.000001 |
| enriched | Kaposi sarcoma-associated herpesvirus infection | 16    | 2.636900       | 0.000002 |
| enriched | Necroptosis                                     | 15    | 2.310830       | 0.000002 |
| enriched | Epstein-Barr virus infection                    | 16    | 2.835380       | 0.000004 |

|          |                                                               |    |          |          |
|----------|---------------------------------------------------------------|----|----------|----------|
| enriched | Human cytomegalovirus infection                               | 16 | 3.189800 | 0.000016 |
| enriched | PI3K-Akt signaling pathway                                    | 20 | 5.004440 | 0.000016 |
| enriched | NOD-like receptor signaling pathway                           | 14 | 2.551840 | 0.000029 |
| enriched | Human immunodeficiency virus 1 infection                      | 15 | 2.991320 | 0.000032 |
| enriched | Human papillomavirus infection                                | 17 | 4.664190 | 0.000341 |
| enriched | Transcriptional misregulation in cancer                       | 12 | 2.622720 | 0.000885 |
| enriched | Herpes simplex virus 1 infection                              | 20 | 6.946670 | 0.001346 |
| enriched | Tuberculosis                                                  | 11 | 2.509310 | 0.002541 |
| enriched | Pathways in cancer                                            | 20 | 7.499570 | 0.003385 |
| enriched | Graft-versus-host disease                                     | 5  | 0.581252 | 0.014473 |
| enriched | Viral protein interaction with cytokine and cytokine receptor | 7  | 1.417690 | 0.024144 |
| enriched | TNF signaling pathway                                         | 7  | 1.587810 | 0.043295 |
