# Supplementary material for: Wrinkle in the plan: miR-34a-5p impacts chemokine signaling by modulating CXCL10/CXCL11/CXCR3-axis in CD4+, CD8+ T cells, and M1 macrophages
Source: PubMed Central journal article supplement — J Immunother Cancer. 2020 Nov 23;8(2):e001617. doi: 10.1136/jitc-2020-001617 (PMC7684812; doi:10.1136/jitc-2020-001617), 2020-11-23
Supplement: jitc-2020-001617supp006.pdf [file jitc-2020-001617supp006.pdf]

geneList.ora.zip

## WikiPathways

No significant categories have been found.

## GO - Molecular Function

| Type     | Name                 | #Hits | Expected score | p-Value  |
|----------|----------------------|-------|----------------|----------|
| depleted | nucleic acid binding | 15    | 35.418900      | 0.026638 |

## GO - Biological Process

No significant categories have been found.

## Reactome - Pathways

No significant categories have been found.

## GO - Cellular Component

No significant categories have been found.

## KEGG - Pathways

No significant categories have been found.
