# Supplementary material for: Wrinkle in the plan: miR-34a-5p impacts chemokine signaling by modulating CXCL10/CXCL11/CXCR3-axis in CD4+, CD8+ T cells, and M1 macrophages
Source: PubMed Central journal article supplement — J Immunother Cancer. 2020 Nov 23;8(2):e001617. doi: 10.1136/jitc-2020-001617 (PMC7684812; doi:10.1136/jitc-2020-001617), 2020-11-23
Supplement: jitc-2020-001617supp007.pdf [file jitc-2020-001617supp007.pdf]

| <b>C-X-C motif ligands</b> |                        |                                                    |
|----------------------------|------------------------|----------------------------------------------------|
| <b>GeneSymbol</b>          | <b>RefSeqAccession</b> | <b>Median log2 Fold Change:<br/>miR-34a vs ANC</b> |
| CXCL11                     | NM_005409              | -1.751                                             |
| CXCL10                     | NM_001565              | -1.302                                             |
| CXCL16                     | NM_022059              | -0.083                                             |
| CXCL2                      | NM_002089              | -0.001                                             |
| CXCL5                      | NM_002994              | 0.005                                              |
| CXCL9                      | NM_002416              | 0.071                                              |
| CXCL1                      | NM_001511              | 0.121                                              |
| CXCL12                     | NM_001033886           | 0.154                                              |

  

| <b>C-X-C motif receptors</b> |                        |                                                    |
|------------------------------|------------------------|----------------------------------------------------|
| <b>GeneSymbol</b>            | <b>RefSeqAccession</b> | <b>Median log2 Fold Change:<br/>miR-34a vs ANC</b> |
| CXCR3                        | NM_001142797           | -0.295                                             |
| CXCR1                        | NM_000634              | -0.189                                             |
| CXCR3                        | NM_001504              | -0.167                                             |
| CXCR2                        | NM_001557              | 0.025                                              |
