# Supplementary figures and images for: Wrinkle in the plan: miR-34a-5p impacts chemokine signaling by modulating CXCL10/CXCL11/CXCR3-axis in CD4+, CD8+ T cells, and M1 macrophages
Source: PubMed Central journal article supplement — J Immunother Cancer. 2020 Nov 23;8(2):e001617. doi: 10.1136/jitc-2020-001617 (PMC7684812; doi:10.1136/jitc-2020-001617), 2020-11-23

## Figure S1

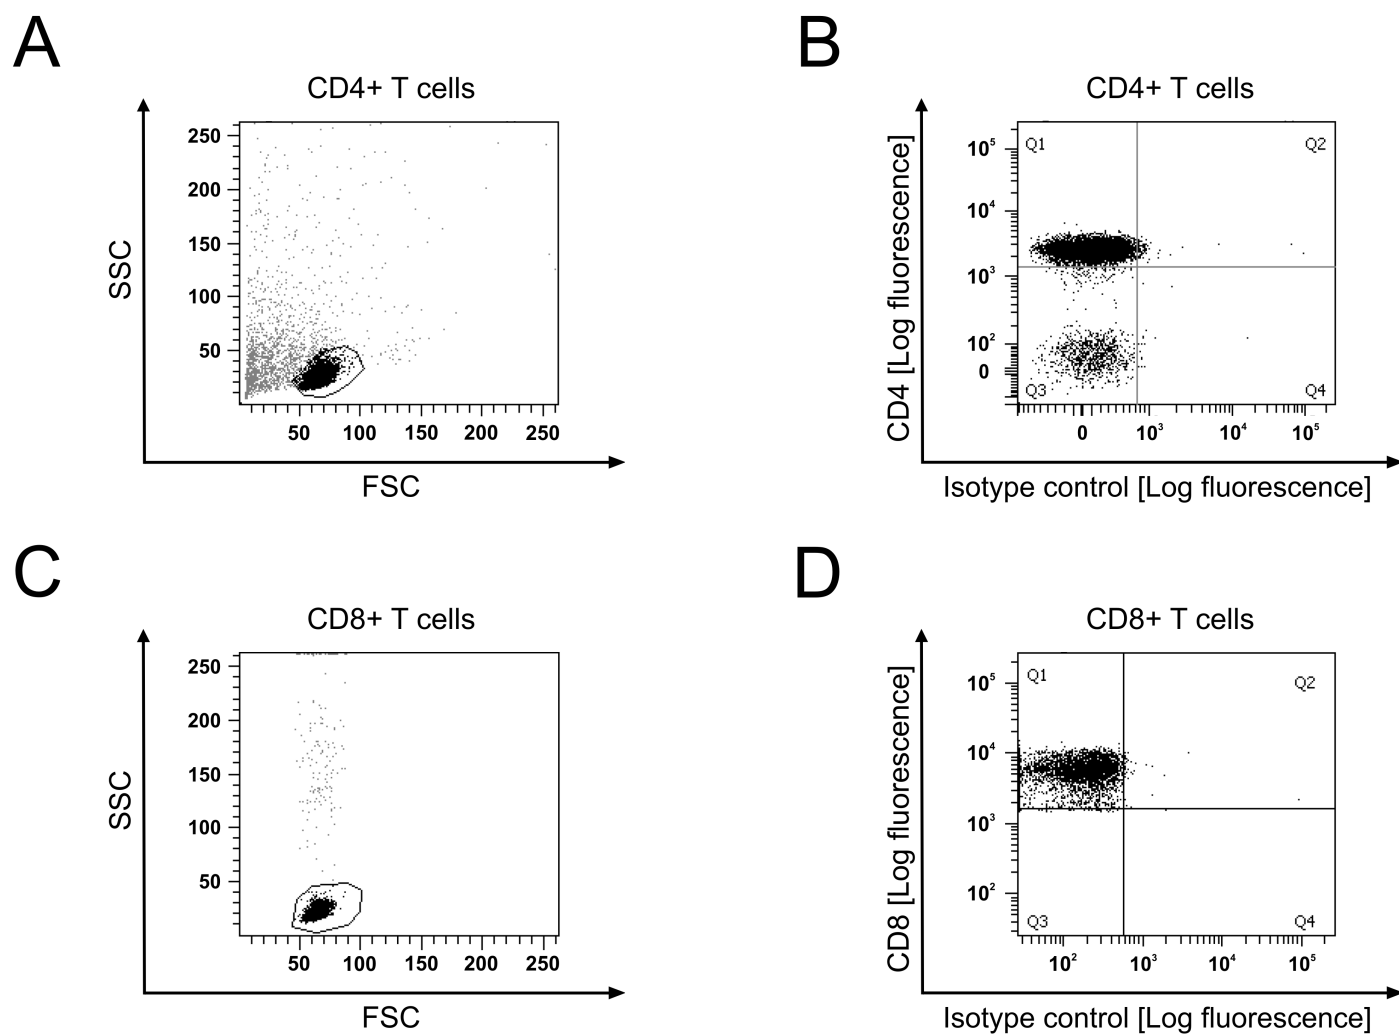

Supplement: jitc-2020-001617supp003.pdf [file jitc-2020-001617supp003.pdf]

# Figure S2

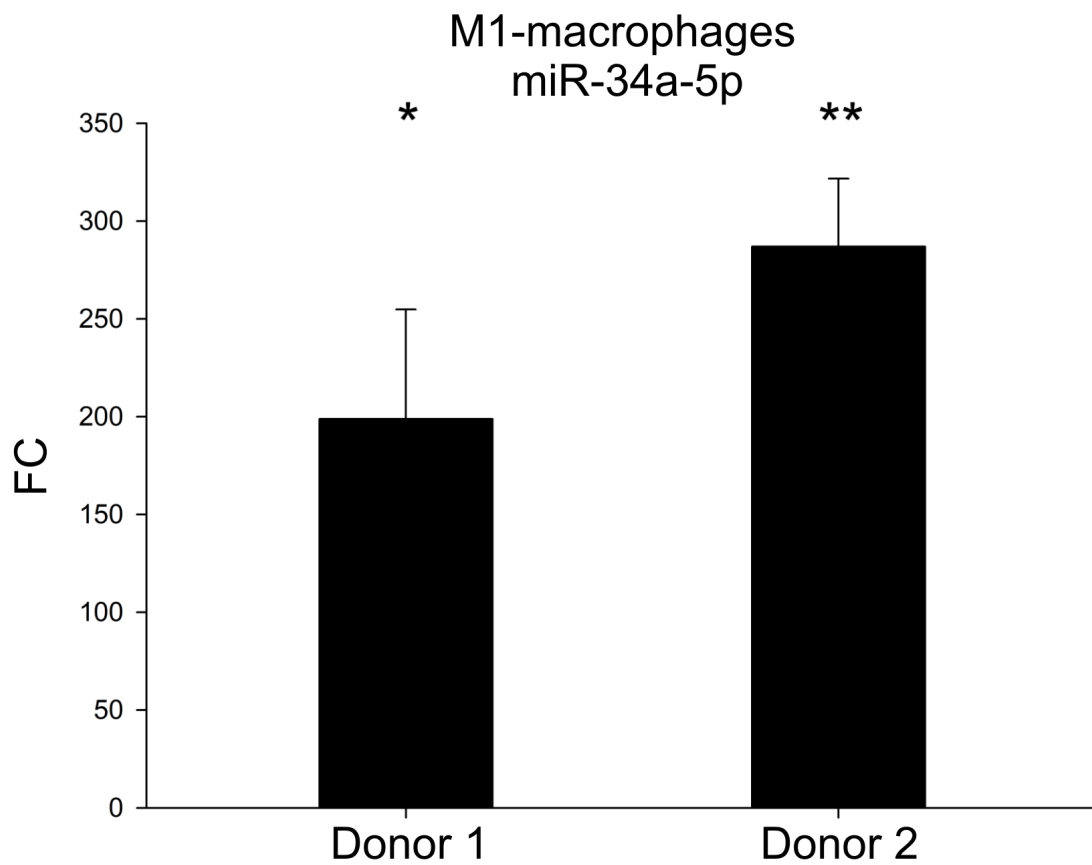

Supplement: jitc-2020-001617supp004.pdf [file jitc-2020-001617supp004.pdf]
